# Supplementary material for: Two new inorganic–organic hybrid zinc phosphites and their derived ZnO/ZnS heterostructure for efficient photocatalytic hydrogen production
Source: Royal Society of Chemistry journal article supplement (doi:10.1039/c9ra06919d), 2020-01-01
Supplement: c9ra06919d1.pdf [file c9ra06919d1.pdf]

## Supplemental Material

### **Two new inorganic-organic hybrid zinc phosphite and their derived ZnO/ZnS heterostructure for efficient photocatalytic hydrogen production**

Yayong Sun<sup>a,b#</sup>, Fupeng Wang<sup>a#</sup>, Yunlei Fu<sup>a</sup>, Chao Chen<sup>a</sup>, Xuanyi Wang<sup>a</sup>,  
Zhenyu Xiao<sup>a\*</sup>, Yanru Liu<sup>a</sup>, Jixiang Xu<sup>a</sup>, Bin Li<sup>a\*</sup>, Lei Wang<sup>a</sup>

<sup>a</sup> *Key Laboratory of Eco-chemical Engineering, Ministry of Education, Inorganic Synthesis and Applied Chemistry, College of Chemistry and Molecular Engineering, Qingdao University of Science and Technology, Qingdao 266042, P. R. China.*

<sup>b</sup> *State Key Laboratory of Structural Chemistry Fujian Institute of Research on the Structure of Mater, Chinese Academy of Sciences, Fuzhou, Fujian 350002, P. R. China*

<sup>#</sup> *These authors contributed equally to this work.*

## (1) X-ray crystallography

The crystallographic diffraction data of **1** and **2** were collected with an Agilent Technologies Gemini A Ultra diffractometer equipped with graphite-monochromated Mo-K $\alpha$  radiation ( $\lambda = 0.71073 \text{ \AA}$ ) at room temperature. All absorption corrections were applied using the multiscan program SADABS. The structure was solved and refined using Full-matrix least-squares based on  $F^2$  with program SHELXS-97 and SHELXL-97 [1] within Olex2 [2]. All non-hydrogen atoms of two crystal structures were refined with anisotropic thermal parameters. The positions of hydrogen atoms were geometrically placed. The crystallographic data and structural refinement parameters of the five CPs are summarized in Table S1 and the selected bond lengths and angles are given in Table S2.

## (2) Table S1 Crystal data and structure refinements for compound **1** and **2**.

| Comound                            | <b>1</b>                                                        | <b>2</b>                                                         |
|------------------------------------|-----------------------------------------------------------------|------------------------------------------------------------------|
| Empirical formula                  | C <sub>7</sub> H <sub>8</sub> N <sub>2</sub> O <sub>3</sub> PZn | C <sub>8</sub> H <sub>10</sub> N <sub>2</sub> O <sub>3</sub> PZn |
| Formula weight                     | 264.49                                                          | 277.51                                                           |
| T, K                               | 293(2)                                                          | 293(2)                                                           |
| crystal system                     | orthorhombic                                                    | monoclinic                                                       |
| space group                        | <i>Pbcn</i>                                                     | <i>P2<sub>1</sub>/c</i>                                          |
| a (Å)                              | 8.8182(5)                                                       | 5.2103(2)                                                        |
| b (Å)                              | 10.1110(4)                                                      | 11.7634(5)                                                       |
| c (Å)                              | 21.4930(9)                                                      | 17.4168(8)                                                       |
| $\alpha$ (deg)                     | 90                                                              | 90                                                               |
| $\beta$ (deg)                      | 90                                                              | 99.315(4)                                                        |
| $\gamma$ (deg)                     | 90                                                              | 90                                                               |
| $V$ (Å <sup>3</sup> )              | 1916.33(15)                                                     | 1053.41(8)                                                       |
| Z                                  | 8                                                               | 4                                                                |
| $D_c$ (g/cm <sup>3</sup> )         | 1.834                                                           | 1.750                                                            |
| $\mu$ (mm <sup>-1</sup> )          | 2.710                                                           | 2.470                                                            |
| $F(0\ 0\ 0)$                       | 1064.0                                                          | 560.0                                                            |
| $R_{int}$                          | 0.0453                                                          | 0.0513                                                           |
| GOF on $F^2$                       | 1.030                                                           | 1.156                                                            |
| $R_1^a/wR_2^b$<br>$I > 2\sigma(I)$ | $R_1 = 0.0317,$<br>$wR_2 = 0.0714$                              | $R_1 = 0.1745,$<br>$wR_2 = 0.4731$                               |
| $R_1, wR_2$<br>(all data)          | $R_1 = 0.0442,$<br>$wR_2 = 0.0782$                              | $R_1 = 0.1774,$<br>$wR_2 = 0.474$                                |

$$^aR_1 = \Sigma(|F_o| - |F_c|)/\Sigma|F_o|, \quad ^b wR_2 = [\Sigma w(|F_o|^2 - |F_c|^2)^2/\Sigma(F_o^2)^2]^{1/2}$$

**(3) Table: S2 Selected bond lengths (Å) and angles (deg) for 1 and 2**

---

| Complex 1               |            |                                       |            |
|-------------------------|------------|---------------------------------------|------------|
| Zn1-O1                  | 1.951(2)   | Zn1-O2 <sup>i</sup>                   | 1.933(2)   |
| Zn1-N1                  | 2.002(3)   | Zn1-O3 <sup>ii</sup>                  | 1.910(2)   |
| O1-Zn1-N1               | 107.78(11) | O3 <sup>ii</sup> -Zn1-O1              | 110.53(10) |
| O2 <sup>i</sup> -Zn1-O1 | 108.49(11) | O3 <sup>ii</sup> -Zn1-N1              | 113.89(11) |
| O2 <sup>i</sup> -Zn1-N1 | 112.98(11) | O3 <sup>ii</sup> -Zn1-O2 <sup>i</sup> | 103.05(10) |

Symmetry code: (i) 1-x, 1-y, 1-z; (ii) -1/2+x, 1/2-y, 1-z; (iii) -x, y, 3/2-z; (iv) 1/2+x, 1/2-y, 1-z.

  

| Complex 2               |           |                                       |           |
|-------------------------|-----------|---------------------------------------|-----------|
| Zn1-O1                  | 1.941(2)  | Zn1-N1                                | 2.007(17) |
| Zn1-O3 <sup>i</sup>     | 1.929(15) | Zn1-O2 <sup>ii</sup>                  | 1.933(15) |
| O1-Zn1-N1               | 111.1(7)  | O2 <sup>ii</sup> -Zn1-O1              | 109.9(8)  |
| O3 <sup>i</sup> -Zn1-O1 | 113.0(7)  | O2 <sup>ii</sup> -Zn1-O3 <sup>i</sup> | 112.3(7)  |
| O3 <sup>i</sup> -Zn1-N1 | 109.7(8)  | O2 <sup>ii</sup> -Zn1-N1              | 100.2(7)  |

Symmetry code: (i): 1-x, 1-y, 1-z; (ii): -x, 1-y, 1-z; (iii): -x, 1-y, -z.

---

**(4) Table: S3 Hydrogen bonds for 2**

---

| D-H...A(Å)(symmetry mode)        | H...A(Å) | D...A(Å) | D-H...A(deg) |
|----------------------------------|----------|----------|--------------|
| Complex 2                        |          |          |              |
| C5-H5A...O2 (-1+x, 0.5-y, 0.5+z) | 2.502(2) | 3.412(4) | 155.7(2)     |
| C4-H4...O1 (x, 0.5-y, 0.5+z)     | 2.343(2) | 3.267(4) | 173.4(2)     |

---

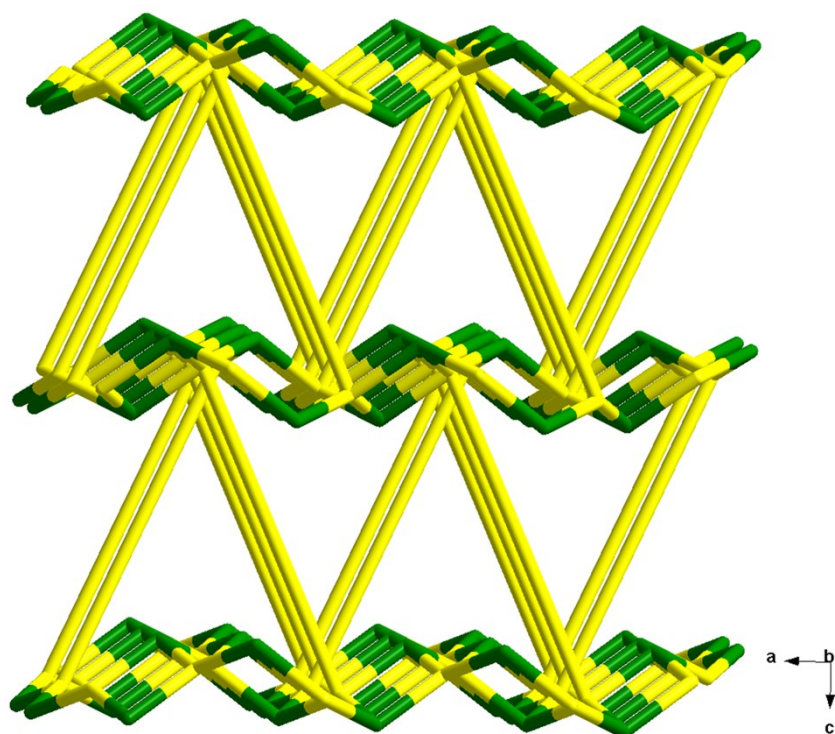

**Fig. S1.** The 3D 2-nodal 3,4-connected  $3,4L83$  topology of compound **1** with point symbol of  $\{4.8^2.10^3\}\{4.8^2\}$ .

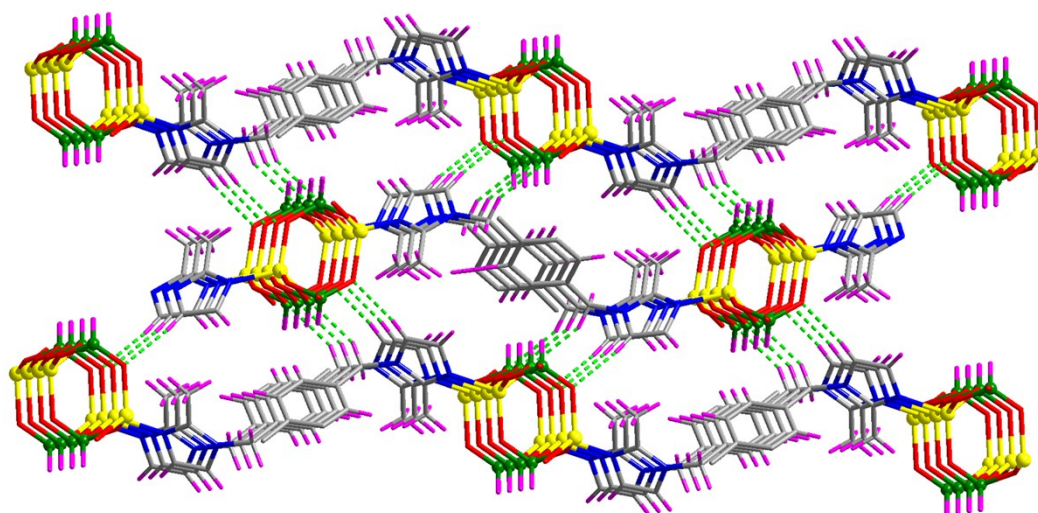

**Fig. S2.** 3D hydrogen bonding supramolecule of compound **2**.

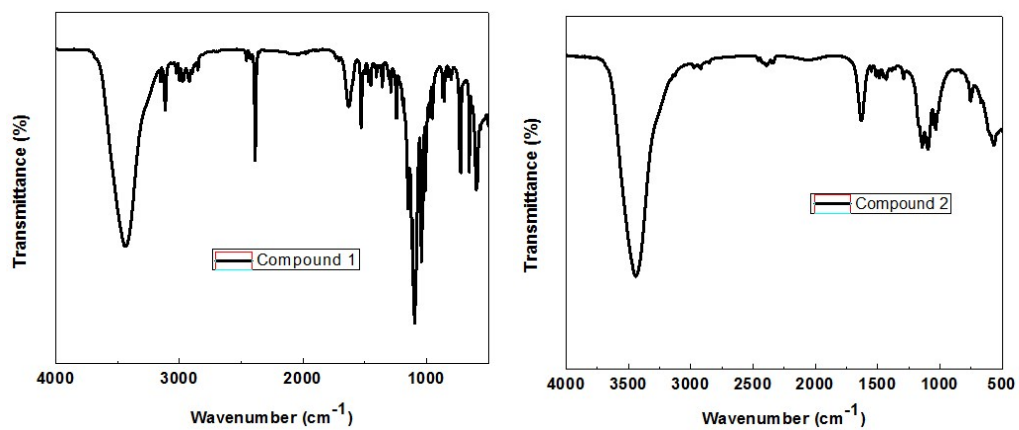

Fig. S3: IR spectra of 1 and 2

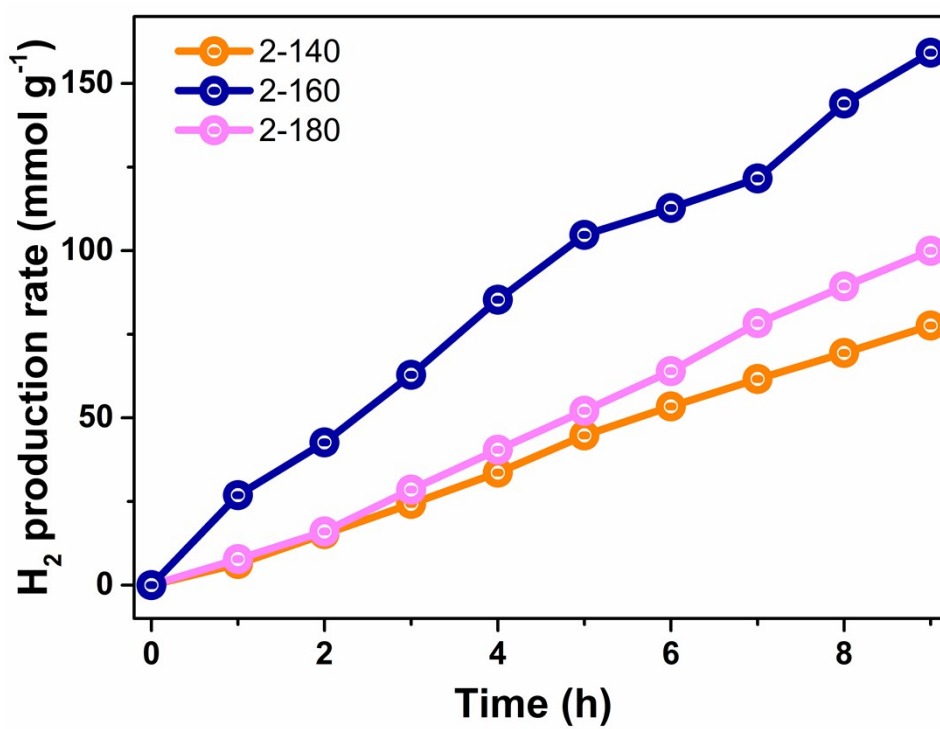

Fig. S4: Plots of photocatalytic H<sub>2</sub> evolution amount of 2-140, 2-160 and 2-180.

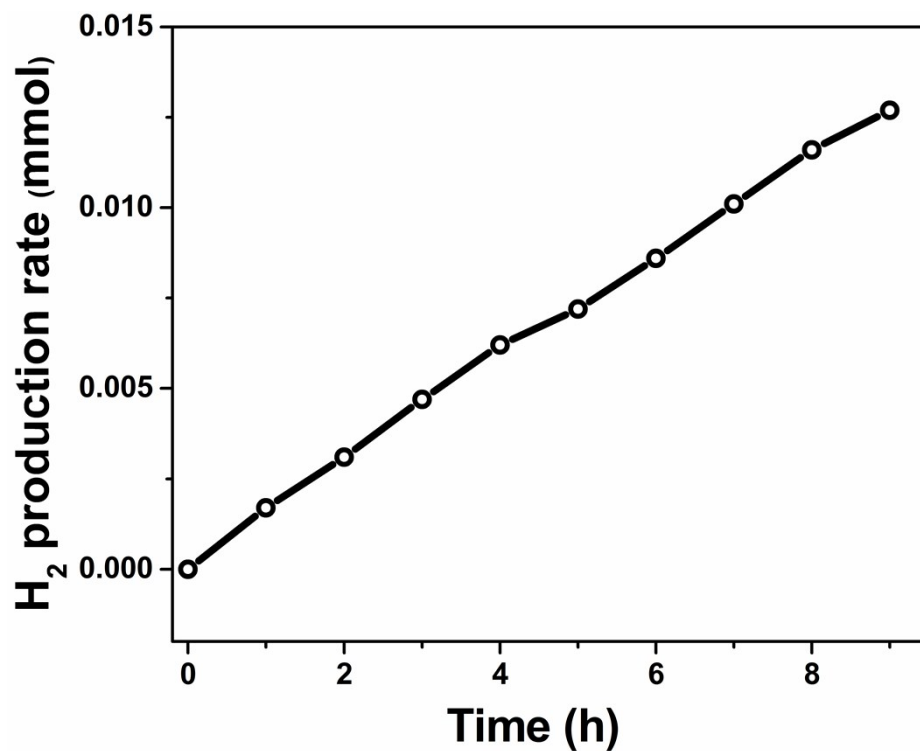

**Fig. S5:** Plots of photocatalytic H<sub>2</sub> evolution amount of the controlled experiment by merely irradiating Na<sub>2</sub>S/Na<sub>2</sub>SO<sub>3</sub> solution.

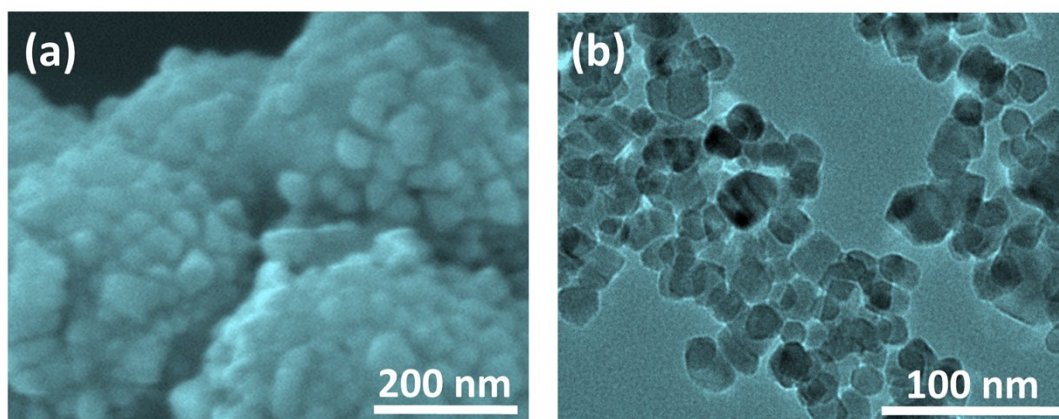

**Fig. S6:** a) The SEM and b) TEM images of 2-160.

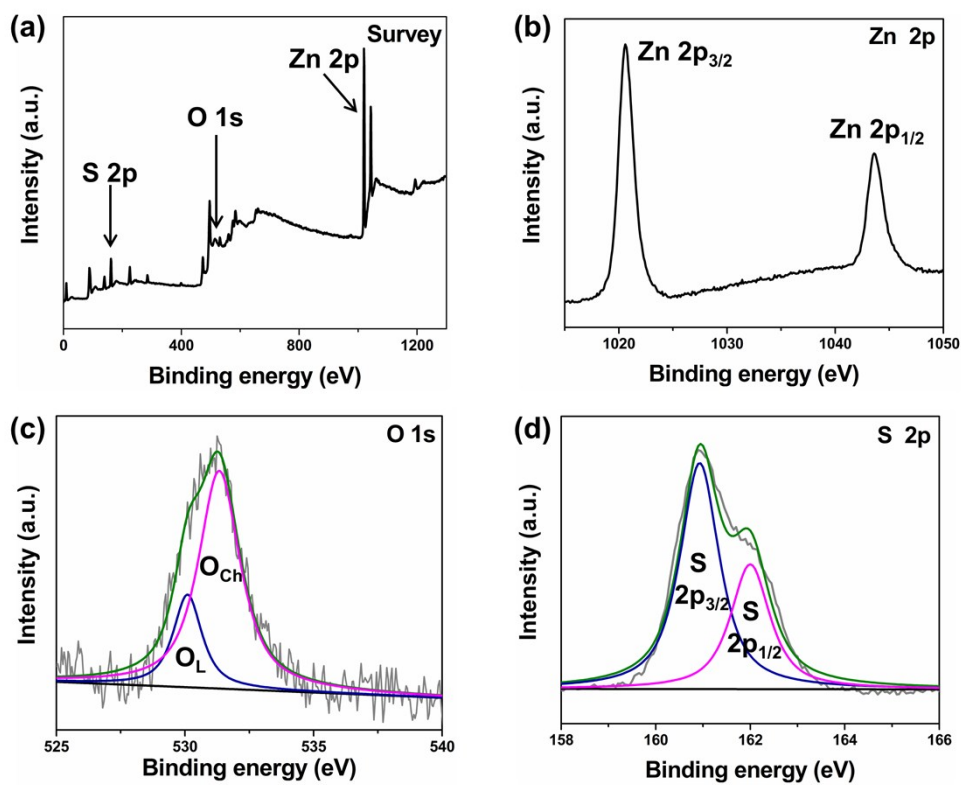

**Fig. S7:** (a) The XPS Survey spectrum and high resolution spectra of Zn 2p (b), O 1s (c) and S 2p (d) in **1-160** sample.

**Equation S1:**

$$\begin{aligned}\text{The apparent quantum yield} &= \frac{\text{Number of reacted electrons}}{\text{Number of incident photons}} \times 100\% \\ &= \frac{2 \times \text{number of evolved H}_2 \text{ molecules}}{\text{Number of incident photons}} \times 100\% \\ &= \frac{2 \times n_{H_2}}{n_p} \times 100\% \\ &= \frac{2 \times n_{H_2}}{n_p} \times 100\%\end{aligned}$$

Where  $n_{H_2}$  and  $n_p$  stand for the number of  $H_2$  molecules and photons, respectively;  $P$  is the light power;  $t = 3600$  s represents the irradiation time;  $\lambda = 420$  nm is the wavelength of incident light;  $h = 6.63 \times 10^{-34}$  J s is the Planck constant; and  $c = 3.0 \times 10^8$  m s<sup>-1</sup> is the light speed.

**References**

- [1]. G.M. Sheldrick., Acta Cryst., A64 (2008) 112.
- [2]. O. V. Dolomanov, L. J. Bourhis, R. J. Gildea, J. A. K. Howard, H. Puschmann., J. Appl. Cryst. 42 (2009) 339.
